# Supplementary material
Source: PubMed Central journal article supplement (PMC9533844)
Supplement: mmc1.pdf [file mmc1.pdf]

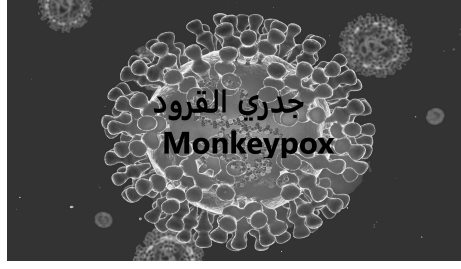

تقييم معلومات البالغين عن جدري القرود مقارنة بالكوفيد

Monkeypox versus COVID-19 Vaccine and Perceptions among Adults and Parents

أنت مدعو للمشاركة في هذه الدراسة عن رأي البالغين بالنسبة لجدري القرود و الكوفيد

الدراسة موافق عليها من لجنة الأبحاث في جامعة الملك سعود و مشاركتك فيها طوعية حيث نهدف من خلالها لمعرفة رأي البالغين او الوالدين بالنسبة لجدري القرود و الكوفيد

و لمزيد من المعلومات يمكنك التواصل مع الباحثين الرئيسيين  
Emerging Infectious Disease Research Consortium  
med.researcher.2020@gmail.com

**You are invited to participate in this study which assesses the factors affecting adults' perceptions of Monkeypox versus COVID-19.**

**The study was approved by the research comity of King Saud University and your participation is voluntary, we aim of this study is to assess the factors affecting parents' acceptance and perceptions of the COVID-19 or Monkeypox vaccine.**

**The study was approved by the research committee of King Saud University and your participation is voluntary.**

**For more information, you can email the principal investigator: Emerging Infectious Disease Research Consortium  
med.researcher.2020@gmail.com**

\* 1. مدى التزام الأسرة مع توصيات الاحترازية لكوفيد (مثل ارتداء الكمامة و التباعد الاجتماعي و تجنب الأماكن المزدحمة  
How is the family's commitment to COVID precautions recommendations (like wearing masks and social distancing and avoiding crowds)

Rarely committed نادراً ملتزم

Medium commitment متوسط التزام

Always committed دائماً ملتزم

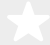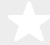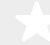

\* 2. العمر

18-24

45-54

25-34

55-64

35-44

65+

\* 3. الجنس: What is your gender?

- Female انثى  
 Male ذكر

\* 4. Parent's education: المستوى التعليمي :

- Primary school ابتدائي  University جامعي  
 Middle school متوسط  Master/PhD (دراسات عليا - ماجستير - دكتوراه)  
 Highschool ثانوي

\* 5. Job-status؟ العمل

- Freelance اعمال حرة  Employee موظف - موظفة  
 Student طالب - طالبة  Teacher مدرس - مدرسة  
 Healthcare worker قطاع صحي  Unemployed لا اعمل حالياً

\* 6. هل اصبت انت بكوفيد سابقاً؟

Were you affected by COVID-19 yourself?

- No لا  
 Yes, but did not require hospitalization نعم لكن لم احتاج التنويم بالمستشفى  
 Yes, and required hospitalization نعم و احتجت التنويم بالمستشفى  
 Yes, and required hospitalization and ICU نعم و احتجت التنويم بالمستشفى في العناية المركزة

\* 7. مقارنة مع الكوفيد: ما هو مستوى القلق لديك حالياً من جدري القروء؟

Compared to COVID-19: how much are you worried nowadays about the Monkeypox?

- Much worried with the COVID-19 قلق اكثر بسبب الكوفيد  
 More worried with Monkeypox قلق أكثر من جدري القروء

\* 8. هل تعتقد ان مرض جدري القروء مرض خطير وسريع الانتقال. يستدعي اتخاذ إجراءات احترازية تنفسية و تلامسية؟

Do you think that Monkeypox is a dangerous and rapidly transmitted disease that calls for respiratory and contact precautionary measures to be taken?

- Yes نعم  
 No لا

\* 9. هل تعتقد ان لقاح مرض الجدري Smallpox الذي كان يعطى قبل سنة 1980م

Do you think that the Smallpox vaccine that was given before 1980 is effective against Monkeypox?

- Yes نعم
- No لا
- I do not know لا أعلم

\* 10. هل تعتقد أن لقاح جدري الماء (العنجز) الذي يعطى للأطفال منذ بداية سنة 2000م

Do you think that the chickenpox vaccine given to children since 2000 is effective against Monkeypox?

- Yes نعم
- No لا
- I do not know لا أعلم

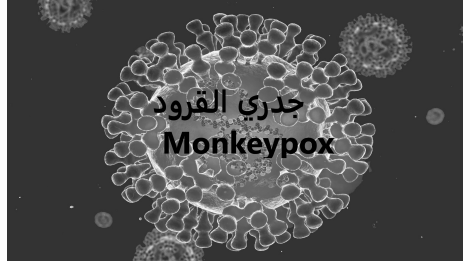

تقييم معلومات البالغين عن جدري القرود مقارنة بالكوفيد

أسباب القلق من جدري القرود. 11 \*  
(الرجاء اختيار كل ما ينطبق)

Worry reasons for the Monkeypox  
(Please choose all that apply)

- me or my family being affected by the Monkeypox disease ان اصاب أنا او احد افراد اسرتي بمرض جدري القرود
- another worldwide pandemic ان يؤدي المرض الى جائحة ثانية
- worried Monkeypox might surge to cause national lockdown الزيادة المتسارعة في حالات جدري القرود قد تؤدي الى اعادة الحجر
- international flight suspension توقف الرحلات الدولية
- (غير ذلك) يرجى تحديدها  
Other (please specify)



تقييم معلومات البالغين عن جدري القرود مقارنة بالكوفيد

\* 12. على حد علمك ، كيف ينتقل جدري القرود إلى البشر؟

To the best of your knowledge, how is Monkeypox transmitted to humans?

- respiratory secretions الإفرازات التنفسية  Sexual contact التواصل الجنسي
- Contact, especially pimples الملامسة خاصة البثور الجلدية  Food and drinks الطعام و الشراب
- Touching contaminated surfaces ملامسة الاسطح الملوثة
- (غير ذلك) يرجى تحديدها  
Other (please specify)

\* 13. هل تعلم بان مرض جدري القرود يمكن ان ينتقل قبل ظهور الاعراض خاصة البثور الجلدية؟

Did you know that Monkeypox can be transmitted before symptoms appear, especially skin blisters?

- Yes نعم
- No لا

\* 14. هل تؤيد التلقيح ضد جدري القرود في هذه المرحلة؟

Do you support the Monkeypox vaccination at this stage?

- Yes نعم
- No لا



تقييم معلومات البالغين عن جدري القرود مقارنة بالكوفيد

من الذي يحتاج لتطعيم جدري القرود في رأيك؟ \* 15

(الرجاء اختيار كل ما ينطبق)

Who do you think needs to be vaccinated for Monkeypox?

(Please choose all that apply)

- Patients with immune deficiency ضعيفي المناعة
- Elderly كبار السن
- Children الأطفال
- Patients with chronic disease (like DM, hypertension, renal or liver disease, cardiac or chronic lung disease) المصابين بأمراض مزمنة مثل السكري او ارتفاع الضغط او قصور الكلى او تليف الكبد او ضعف عضلة القلب او تليف الرئة
- Patients with cancer المرضى المصابين بالأورام
- Healthcare providers الممارسين الصحيين
- Teachers المدرسين
- (غير ذلك) يرجى التحديد  
Other (please specify)



## تقييم معلومات البالغين عن جدري القرود مقارنة بالكوفيد

16. \* ما هي مصادر معلوماتك عن جدري القرود بشكل عام؟  
(اختر كل ما ينطبق عليك من فضلك)

What are your Monkeypox information sources?  
(Please choose all that apply)

- المواقع الصحية الحكومية المحلية مثل وزارة الصحة - وقاية  
Local government health websites such as the Ministry of Health - Weqaya (Saudi CDC)
- (المواقع الصحية الدولية الرسمية (منظمة الصحة العالمية ومركز السيطرة على الأمراض  
International health official websites (WHO and CDC)
- مواقع التواصل الاجتماعي مثل تويتر او الواتساب او الفيسبوك او يوتيوب أو وسائل الاعلام  
Social networking sites such as Twitter, WhatsApp, Facebook, or other media
- (غير ذلك (يرجى التحديد  
Other (please specify)

17. هل تعلم اذا كان هناك علاج شافي لمرض جدري القرود؟  
Do you know if there is a cure for Monkeypox?

- لا يوجد علاج ناجع والعلاج مجرد رعاية عامة  
There is no effective treatment, treatment is just general care
- هناك مضادات فيروسية لعلاج هذا المرض  
There are antivirals to treat this disease



## تقييم معلومات البالغين عن جدري القرود مقارنة بالكوفيد

\* 18. GAD 7:

Over the last 2 weeks, how often have you been bothered by any of the following problems?

ما مدى تكرار انزعاجك من أي مشكلة من المشكلات التالية خلال الأسبوعين الأخيرين؟

Not at all أبدا  
Several days عدة أيام  
More than half the days أكثر من نصف الأيام  
Nearly every day كل يوم تقريبا

Feeling nervous,  
anxious or on edge?  
الشعور بالتوتر، العصبية أو القلق

Not being able to  
stop or control  
worrying?  
عدم القدرة على إيقاف قلقك  
وهومك أو السيطرة عليها

Worrying too much  
about different  
things?  
القلق و الهم الزائد حيال عدة أمور

Trouble relaxing?  
صعوبة في الاسترخاء

Being so restless  
that it is hard to sit  
still?  
الشعور بعدم الاستقرار لدرجة  
تصعب عليك فيها الجلوس بلا حركة

Becoming easily  
annoyed or irritable?  
الانفعال أو الانزعاج بسهولة

Feeling afraid as if  
something awful  
might happen?  
الشعور بالخوف وكأن شيء مريع  
قد يحدث لك





تقييم معلومات البالغين عن جدري القرود مقارنة بالكوفيد

اسئلة اختيارية

Optional questions

19. اختياري: يمكنك كتابة ايميلك للإشتراك في سحب على كوبونات اونلاين.

Optional: You can provide your email to join the lucky draw for online coupons

20. كم عدد الأشخاص الذين تعيش معهم؟

How many persons do you live with?

- 1-3 members  
 4-6 persons  
 7-10 persons  
 >=11

\* 21. متوسط الدخل الشهري للعائلة:

Mean family's monthly income

- أقل من 10000 SR  
 أكثر من 20000 SR  
 15000-10000 ريال  
 افضل عدم الإجابة  
 15001-20000 ريال SR

22. هل شجعك هذا الاستبيان على القراءة أكثر عن جدري القرود؟

Did this survey encourage you to read more about Monkeypox?

- Yes نعم  
 No لا
